# Supplementary material
Source: publisher figshare collection journal article supplement (https://gsapubs.figshare.com/ndownloader/files/23172998)
Supplement: Supplementary file 1 [file 23172998]

## **Supplemental Material**

### **Methodology**

#### Hardware Set-up

We use a small photography set-up consisting of a 30 cm-across, square, white, plastic Lazy-Susan turntable, a 50 cm-across, cubic, fabric lightbox with three LED ring lights, and an 18.4 MP Sony DSC-HX80 compact digital camera mounted on a simple tripod. We use a matte black background in the lightbox with pastel white filters on the LED lights. The turntable is marked-up with pairs of colored dots in the corners and approximately halfway towards the center; these are used to assist manual registration of images. Samples up to 40 cm-diameter can be accommodated but we generally restrict ourselves to samples less than 25 cm-diameter to enable use of the registration marks on the turntable.

#### Computer and Software Set-up

Photographs are uploaded to and backed-up on a dedicated Google Drive Team account. We use *Agisoft Metashape Basic* photogrammetry software (<https://www.agisoft.com/>) on a consumer-grade laptop PC (2.21 GHz, 16 GB, 64 bit) and a research-grade (3.2 GHz, 32 GB, 64 bit) desktop PC, both running Windows 10 and graphics accelerated. We have also run smaller models successfully on a Mac Book Pro 13 (1.4 GHz, 8 GB). There is no appreciable difference in quality; however, processing time correlates with RAM, processor, and GPU speed. A typical model batch processed at high-quality settings takes up to 2 hours machine time.

*Metashape Basic* is run with GPU acceleration enabled and contemporaneous CPU processing. Images are aligned at high-quality with a key point limit of 250,000 and tie point limit of 100,000 (both significantly higher than the defaults). The aligned images are converted to a dense point cloud at high-quality with mild depth filtering. The mesh is constructed from the dense point cloud with a medium face count. The textured skin is constructed using the imported images and default settings. Completed models are exported as *.glb* files (usually 100 – 200 Mb) to ease uploading to *Sketchfab.com*.

### **Photo Capture and Processing**

A sample is placed on the center of the turntable and illuminated from the front (upper-middle, lower-left, and lower-right). One half of a sample is photographed at a time in three revolutions of the turntable (e.g., Dimitriu and Balan, 2017; Riquelme et al., 2019): sub-horizontal,  $\sim 45^\circ$  from horizontal, and  $\sim 80^\circ$ ; for a total of 50 – 100 images. The sample is then turned over and the process repeated. Images for each half are uploaded into separate ‘chunks’ in *Agisoft Metashape* and processed independently. After extraneous voxels and the model of the turntable are removed by the operator, the two halves are merged together and the seams cleaned-up.

### **Hosting on *Sketchfab.com***

Completed models are hosted in a dedicated page on *Sketchfab.com* (<http://sketchfab.com/WVUpetrology>). Models are named, described and assigned keywords to ease online search engines in finding them, under the ‘edit properties’ control. There we add a logo and make the model downloadable with a Creative Commons license (CC-BY-4.0). We add a doi number generated in *Zenodo* ([www.zenodo.org](http://www.zenodo.org)). Models can be processed further for appearance in *Sketchfab.com* using the ‘edit 3D settings’ control. We usually display models against a clear background and use the PBR renderer and shadeless settings. Models can be post-processed to maximize visual effect. Annotations are added to points of interest on the model. Each numbered annotation includes a title and an optional body of text that can include URLs and images. Audio recorded separately can be added to the model. Animations of the model generated outside of *Sketchfab.com* can be added. Finally, models can be prepared specially for viewing in virtual reality with controls to preset the scale and viewing angles. After a model is added we share it on social media (Twitter - @WVURockDoc) and add it to one of our curated thematic collections of models (<https://sketchfab.com/WVUpetrology/collections>).

### **References Cited**

- Dimitriu, T.-C., Balan, I.V., 2017, 3-D minerals. Auxiliary material for the Physical Geology classes: Analele Stiintifice ale Universitatii “Al. I. Cuza” din Iasi Seria Geologie, v. 63, no. 1–2, p. 25–35. <http://geology.uaic.ro/auig/>
- Riquelme, A., Cano, M., Tomás, R., Jordá, L., Pastor J.L., Benavente, B., 2019, Digital 3D Rocks: A Collaborative Benchmark for Learning Rocks Recognition: Rock Mechanics and Rock Engineering, v. 52, p. 4799-4806, <https://doi.org/10.1007/s00603-019-01843-3>
